# Supplementary material
Source: Springer Nature journal article supplement (https://www.springermedizin.de/resource/supplementary/12889_2013_7176_MOESM1_ESM.pdf/9496946)

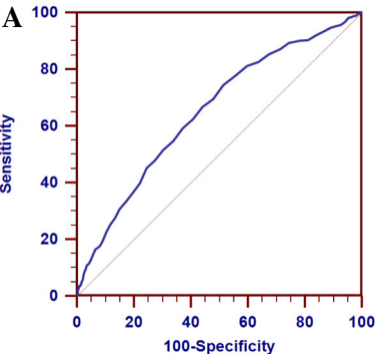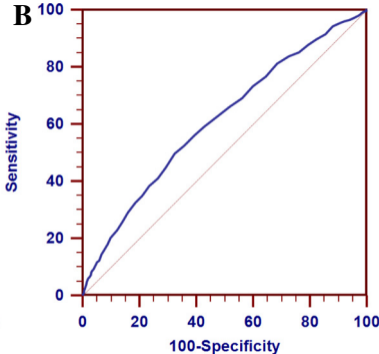

Supplement: MOESM1 [file 9496946]
